# Supplementary material for: Corrosion resistance of graphene directly and locally grown on bulk nickel substrate by laser irradiation
Source: Royal Society of Chemistry journal article supplement (doi:10.1039/c5ra01267h), 2015-01-01
Supplement: c5ra01267h1.pdf [file c5ra01267h1.pdf]

## Supplementary Information

**Table S1.** Electrochemical corrosion reaction kinetic parameters

| HCl(aq) | Sample  | $i_{\text{corr}}$<br>A/cm <sup>2</sup> | $E_{\text{corr}}$<br>mV/SCE | CR<br>mm/year            | $R_p$<br>kΩ·cm <sup>2</sup> |                         |       |
|---------|---------|----------------------------------------|-----------------------------|--------------------------|-----------------------------|-------------------------|-------|
| 0.05M   | Bare Ni | 6.792×10 <sup>-6</sup>                 | -247                        | 7.295×10 <sup>-2</sup>   | 4.131                       |                         |       |
|         |         | 16.311×10 <sup>-6</sup>                | -338                        | 17.518×10 <sup>-2</sup>  | 1.656                       |                         |       |
|         |         | 17.766×10 <sup>-6</sup>                | -337                        | 19.080×10 <sup>-2</sup>  | 1.445                       |                         |       |
|         | Tr      |                                        | 14.841×10 <sup>-6</sup>     | -318                     | 15.94×10 <sup>-2</sup>      | 1.621                   |       |
|         |         |                                        | 21.583×10 <sup>-6</sup>     | -311                     | 23.18×10 <sup>-2</sup>      | 1.052                   |       |
|         |         |                                        | 17.442×10 <sup>-6</sup>     | -313                     | 18.733×10 <sup>-2</sup>     | 1.499                   |       |
|         |         | Gr                                     |                             | 7.058×10 <sup>-6</sup>   | -256                        | 7.580×10 <sup>-2</sup>  | 4.373 |
|         |         |                                        |                             | 8.926×10 <sup>-6</sup>   | -211                        | 9.586×10 <sup>-2</sup>  | 3.884 |
|         |         |                                        |                             | 7.118×10 <sup>-6</sup>   | -285                        | 7.645×10 <sup>-2</sup>  | 3.608 |
|         | 0.1M    | Bare Ni                                | 18.189×10 <sup>-6</sup>     | -352                     | 19.536×10 <sup>-2</sup>     | 1.333                   |       |
|         |         |                                        | 22.021×10 <sup>-6</sup>     | -376                     | 23.651×10 <sup>-2</sup>     | 1.106                   |       |
|         |         |                                        | 21.839×10 <sup>-6</sup>     | -319                     | 23.455×10 <sup>-2</sup>     | 1.103                   |       |
| Tr      |         |                                        | 17.419×10 <sup>-6</sup>     | -341                     | 18.709×10 <sup>-2</sup>     | 1.387                   |       |
|         |         |                                        | 25.298×10 <sup>-6</sup>     | -319                     | 27.17×10 <sup>-2</sup>      | 0.988                   |       |
|         |         |                                        | 9.016×10 <sup>-6</sup>      | -320                     | 9.684×10 <sup>-2</sup>      | 2.679                   |       |
|         |         | Gr                                     |                             | 11.436×10 <sup>-6</sup>  | -306                        | 12.282×10 <sup>-2</sup> | 2.451 |
|         |         |                                        |                             | 6.849×10 <sup>-6</sup>   | -220                        | 7.357×10 <sup>-2</sup>  | 4.444 |
|         |         |                                        |                             | 8.746×10 <sup>-6</sup>   | -301                        | 9.394×10 <sup>-2</sup>  | 2.738 |
| 0.5M    | Bare Ni | 100.304×10 <sup>-6</sup>               | -377                        | 107.762×10 <sup>-2</sup> | 0.280                       |                         |       |
|         |         | 67.464×10 <sup>-6</sup>                | -378                        | 72.456×10 <sup>-2</sup>  | 0.386                       |                         |       |
|         |         | 46.398×10 <sup>-6</sup>                | -382                        | 49.832×10 <sup>-2</sup>  | 0.558                       |                         |       |

---

|    |                          |      |                          |       |
|----|--------------------------|------|--------------------------|-------|
|    | $134.172 \times 10^{-6}$ | -351 | $144.101 \times 10^{-2}$ | 0.209 |
| Tr | $81.737 \times 10^{-6}$  | -349 | $87.786 \times 10^{-2}$  | 0.285 |
|    | $132.198 \times 10^{-6}$ | -350 | $141.981 \times 10^{-2}$ | 0.202 |
|    | $18.842 \times 10^{-6}$  | -354 | $20.238 \times 10^{-2}$  | 1.643 |
| Gr | $9.524 \times 10^{-6}$   | -290 | $10.229 \times 10^{-2}$  | 2.600 |
|    | $20.000 \times 10^{-6}$  | -328 | $21.485 \times 10^{-2}$  | 1.459 |

---
